# Supplementary material
Source: PubMed Central journal article supplement (PMC6327056)
Supplement: 41437_2018_100_MOESM2_ESM.pdf [file 41437_2018_100_MOESM2_ESM.pdf]

| a2        | 10      | 20         | 30 | 40       | 50       | 60                    | 70                    | 80               | 90                  |               |             |
|-----------|---------|------------|----|----------|----------|-----------------------|-----------------------|------------------|---------------------|---------------|-------------|
| Mele*01   | YFYTGVS | SRPGRGEPHF | I  | AVGYVDDT | QFVWF    | SDSASRRMEPRAPWMEQEGPE | YWD                   | PQTRICKDAAQTYREN | LNNLRGYYNQSA        |               |             |
| Mele*02   | .       | A          | .  | R        | .        | R                     | .                     | RE               | NL.ET..G.QTALR      |               |             |
| Mele*03   | .       | .          | R  | .        | R        | .                     | V                     | R                | NL..HAF.V.T.D       |               |             |
| Mele*04   | .       | .          | R  | .        | R        | .                     | L                     | V                | RE.NL.ET..G.QTALR   |               |             |
| Mele*05   | .       | .          | R  | .        | R        | .                     | V                     | R                | NL..HAF.V.T.D       |               |             |
| Mele*06   | .       | .          | R  | .        | R        | .                     | L                     | V                | R.NL..HAF.V.T.D     |               |             |
| Mele*07   | .       | .          | R  | .        | R        | .                     | L                     | V                | R.NL..HAF.V.T.D     |               |             |
| Mele*08   | .       | .          | R  | S        | .        | R                     | Q.E                   | .                | RN..F.ETT..RS..E    |               |             |
| Mele*09   | .       | .          | .  | .        | .        | .                     | V                     | .                | ..T..T..            |               |             |
| Mele*10   | .       | .          | R  | .        | R        | .                     | V                     | R                | NL..HAF.V.T.D       |               |             |
| Mele*11   | .       | A          | .  | R        | S        | .                     | R                     | .                | RE.NL.ET..G.QTALR   |               |             |
| Mele*12   | .       | .          | R  | .        | R        | .                     | V                     | R                | NL..HAF.V.T.D       |               |             |
| Mele*13   | .       | D          | .  | R        | S        | .                     | R                     | .                | RE..ET..VD.T.D.E    |               |             |
| Mele*14   | .       | A          | .  | R        | .        | R                     | L                     | V                | R..ETT..G.QTALR     |               |             |
| Mele*15   | .       | .          | R  | .        | R        | .                     | V                     | R                | NL..HAF.V.T.D       |               |             |
| Mele*16   | .       | S.A        | .  | RYWE     | .        | AR                    | L                     | V                | QE.RV.HN.AFQVS.T..E |               |             |
| Mele*17   | .       | S.A        | .  | RYWE     | .        | AR                    | L                     | V                | QE.RV.HN.AFQVS.T..E |               |             |
| Mele*18   | .       | S.A        | .  | RYWE     | .        | AR                    | L                     | V                | QE.RV.HN.AFQVS.T..E |               |             |
| Mele*19   | .       | S.A        | .  | RYWE     | .        | AR                    | L                     | V                | RE.RV.HN.AFQVS.T..E |               |             |
| Meme*05   | YFYTGVS | SRPGRGEP   | RF | I        | AVGYVDDT | QFVRF                 | SDSASRRMEPRAPWMEQEGPE | YWDRQ            | TRNLKDAAAHAFRVN     | LNTLRDYYNQSAA |             |
| Meme*06   | .       | .          | .  | .        | .        | .                     | V                     | .                | .                   | .             |             |
| Meme*07   | .       | .          | .  | .        | .        | .                     | .                     | Q                | GI.ETTQTY           | RS..N.G       |             |
| Meme*12   | .       | .          | .  | .        | .        | .                     | .                     | .                | .                   | .             |             |
| Meme*13   | .       | .          | .  | A        | .        | L                     | .                     | E                | GI..QTY             | ..I.G         |             |
| Meme*14   | .       | .          | .  | .        | .        | .                     | .                     | .                | .                   | .             |             |
| Meme*15   | .       | S.A        | .  | .        | .        | .                     | V                     | .                | QIC..QTY            | G.Q.AL        |             |
| Meme*16   | .       | A          | .  | A        | .        | .                     | V                     | .                | QIC.ETTQTY          | RS..N.G..E    |             |
| Meme*17   | .       | .          | .  | .        | .        | L                     | .                     | E                | ..ETTQTY            | ..N.G         |             |
| Meme*18   | .       | .          | .  | .        | .        | L                     | .                     | E                | ..ETTQTY            | ..N.G         |             |
| Meme*19   | .       | .          | .  | .        | .        | .                     | .                     | Q                | GI..QT              | G.Q.AL        |             |
| Meme*20   | .       | S.A        | .  | YWE      | .        | A                     | L                     | V                | QE.RV.HN.Q.Q.S      | ..G..E        |             |
| Meme*21   | .       | S.A        | .  | A.YWE    | .        | A                     | P                     | V                | A.E                 | GI..QTY       | D.Q.ALGC..E |
| Meme*PS05 | .       | S.A        | .  | YWE      | .        | A                     | L                     | V                | QE.RV.HN.Q.Q.S      | ..G..E        |             |
| Meme*PS06 | .       | D.A        | .  | P..SE.Q  | .        | S                     | F                     | Q.E              | ~V                  | EE..IC.ETTQTY | GS..I.G..E  |

Supplementary Figure S1a2
