# Supplementary material
Source: PubMed Central journal article supplement (PMC6327056)
Supplement: 41437_2018_100_MOESM5_ESM.pdf [file 41437_2018_100_MOESM5_ESM.pdf]

|                       |                                  |              |                   |                                                  |             |                 |                              |
|-----------------------|----------------------------------|--------------|-------------------|--------------------------------------------------|-------------|-----------------|------------------------------|
|                       | 1                                | 20           | 40                | 60                                               | 80          | 100             | 120                          |
| Meca*07 <sup>2</sup>  | GGTGAGCGACAGGGCCCGGGTCCAGGTCACGA | CCCCATCCCCAC | CGACGGGCGGGTGTACC | - - CCGAGTGTCCGGGTATGAGCGCCACCGTGAGGCTGCGGGACCCA | - - - - -   | - - - - -       | CTTG                         |
| Meca*01 <sup>3</sup>  | .....                            | .....        | T T               | .....                                            | A . . . . . | C C T . . . . . | T - CCCGCTGCCCTCCGCCGT - CCC |
| Meca*02 <sup>4</sup>  | .....                            | .....        | .....             | -- GTTTC T CCAGGG TA AG                          | T . . . . . | CC . . . . .    | C . . . . .                  |
| Meca*03 <sup>17</sup> | .....                            | .....        | .....             | -- GTTTC T CCAGGG TA AG                          | T . . . . . | CC . . . . .    | C . . . . .                  |
| Meca*04               | .....                            | .....        | T T               | .....                                            | A . . . . . | C C T . . . . . | C - A A A . . . . .          |
| Mean*01 <sup>7</sup>  | .....                            | .....        | T T               | .....                                            | A . . . . . | G . . . . .     | C C T . . . . .              |
| Mean*02-03            | .....                            | .....        | T T               | .....                                            | A . . . . . | C C T . . . . . | C - A A A . . . . .          |
| Mean*08               | .....                            | .....        | T T               | .....                                            | A . . . . . | G . . . . .     | C C T . . . . .              |
| Mean*10 <sup>6</sup>  | .....                            | .....        | T T               | .....                                            | A . . . . . | C C T . . . . . | C - A A A . . . . .          |
| Mean*13 <sup>2</sup>  | .....                            | .....        | T T               | .....                                            | A . . . . . | C C T . . . . . | C - A A A . . . . .          |
| Mean*14 <sup>5</sup>  | .....                            | A            | .....             | .....                                            | G . . . . . | - -             | .....                        |
| Mean*15               | .....                            | A            | .....             | .....                                            | G . . . . . | - -             | .....                        |
| Mean*16               | T T                              | -            | A                 | CACT AA CC GGGT GC                               | .....       | C C T . . . . . | CC T A . . . . .             |
| Mele*01               | .....                            | .....        | A T T T           | .....                                            | A . . . . . | G . . . . .     | C C T . . . . .              |
| Mele*02               | .....                            | .....        | A T T T           | .....                                            | A . . . . . | G . . . . .     | C C T . . . . .              |
| Mele*06               | .....                            | .....        | AT C              | ACGTTTC T CCAGGG TA AG                           | T . . . . . | CC . . . . .    | C . . . . .                  |
| Mele*08               | T                                | .....        | T T               | .....                                            | A . . . . . | G . . . . .     | C C T . . . . .              |
| Mele*09               | .....                            | .....        | A T T T           | .....                                            | A . . . . . | G . . . . .     | C C T . . . . .              |
| Mele*11               | .....                            | .....        | T T               | .....                                            | A . . . . . | G . . . . .     | C C T . . . . .              |
| Mele*13               | .....                            | .....        | T T               | .....                                            | A . . . . . | G . . . . .     | C C T . . . . .              |
| Meme*13               | .....                            | .....        | A TAT             | .....                                            | A . . . . . | G . . . . .     | C C T . . . . .              |
| Meme*16               | .....                            | .....        | T T               | .....                                            | A . . . . . | C C T . . . . . | C - T A A . . . . .          |
| Meme*21               | T T                              | -            | A                 | CACT A CC GGGT GC                                | .....       | C C T . . . . . | CC T A . . . . .             |
| Meme*PS05             | .....                            | .....        | T T               | .....                                            | A . . . . . | G . . . . .     | - - - - -                    |
| Meme*PS06             | .....                            | .....        | T T               | .....                                            | A . . . . . | G . . . . .     | C C T . . . . .              |

|                       |                                                                                                                                       |       |       |       |                         |       |       |
|-----------------------|---------------------------------------------------------------------------------------------------------------------------------------|-------|-------|-------|-------------------------|-------|-------|
|                       | 140                                                                                                                                   | 160   | 180   | 200   | 220                     | 240   | 260   |
| Meca*07 <sup>2</sup>  | TGCCAGACCCGGGAAGAGCGCGCGGGAACCTCTAATGGGGTTTACTTTGTGTTTGGACTTAGTCGCTCGCCGGTAGGGGGCTGGGAAGGTTTGGGGGGCTGACCGCTGCTGTGCGGGCTGGGGGGCGGGGCCA |       |       |       |                         |       |       |
| Meca*01 <sup>3</sup>  | CAT TT AG C . . . . . A C . . . . . T T GGC T . . . . . C . . . . .                                                                   |       |       |       | AC C CT T C . . . . .   |       |       |
| Meca*02 <sup>4</sup>  | . A . . CT A . C . . . . C AGC - A . . . . T TC GGCT T . . . . T . . . . C CG . C . . . .                                             |       |       |       | AC C CT A T G . . . . . |       |       |
| Meca*03 <sup>17</sup> | . A . . CT A . C . . . . C AGC - A . . . . T TC GGCT T . . . . T . . . . C CG . C . . . .                                             |       |       |       | AC C CT T G . . . . .   |       |       |
| Meca*04               | CAT TT AG C . . . . . A C . . . . . T T GGC T . . . . . C . . . . .                                                                   |       |       |       | AC C CT T C . . . . .   |       |       |
| Mean*01 <sup>7</sup>  | C T TT AG C . . . . . A C . . . . . T T GGC T . . . . . C . . . . .                                                                   |       |       |       | AC C CT T C . . . . .   |       |       |
| Mean*02-03            | CAT TT AG C . . . . . A C . . . . . T T GGC T . . . . . C . . . . .                                                                   |       |       |       | AC C CT T C . . . . .   |       |       |
| Mean*08               | CAT TT AG C . . . . . A C . . . . . T T GGC T . . . . . C . . . . .                                                                   |       |       |       | AC C CT T C . . . . .   |       |       |
| Mean*10 <sup>6</sup>  | CAT TT AG C . . . . . A C . . . . . T T GGC T . . . . . C . . . . .                                                                   |       |       |       | AC C CT T C . . . . .   |       |       |
| Mean*13 <sup>2</sup>  | C T TT AG C . . . . . A C . . . . . T T GGC T . . . . . C . . . . .                                                                   |       |       |       | AC C CT T C . . . . .   |       |       |
| Mean*14 <sup>5</sup>  | .....                                                                                                                                 | ..... | ..... | ..... | .....                   | ..... | ..... |
| Mean*15               | .....                                                                                                                                 | ..... | ..... | ..... | .....                   | G     | ..... |
| Mean*16               | C T TT AG CC . . . . . A C . . . . . T T GGC T . . . . . C . . . . .                                                                  |       |       |       | AC C CT T C . . . . .   |       |       |
| Mele*01               | C T TT AG C . . . . . A C . . . . . T T GGC T . . . . . C . . . . .                                                                   |       |       |       | AC C CT T C . . . . .   |       |       |
| Mele*02               | CAT TT AG C . . . . . A C . . . . . T T GGC T . . . . . C . . . . .                                                                   |       |       |       | AC C CT T C . . . . .   |       |       |
| Mele*06               | . A . . CT A . C . . . . C AGC - A . . . . T TC GGCT T . . . . T . . . . C CG . C . . . .                                             |       |       |       | AC C CT T G . . . . .   |       |       |
| Mele*08               | C T TT AG C . . . . . A C . . . . . T T GGC T . . . . . C . . . . .                                                                   |       |       |       | AC C CT T C . . . . .   |       |       |
| Mele*09               | CAT TT AG C . . . . . A C . . . . . T T GGC T . . . . . C . . . . .                                                                   |       |       |       | AC C CT T C . . . . .   |       |       |
| Mele*11               | C T TT AG C . . . . . A C . . . . . T T GGC T . . . . . C . . . . .                                                                   |       |       |       | AC C CT T C . . . . .   |       |       |
| Mele*13               | C T TT AG C . . . . . A C . . . . . T T GGC T . . . . . C . . . . .                                                                   |       |       |       | AC C CT T C . . . . .   |       |       |
| Meme*13               | C T TT AG C . . . . . A C . . . . . T T GGC T . . . . . C . . . . .                                                                   |       |       |       | AC C CT T C . . . . .   |       |       |
| Meme*16               | CAT TT AG C . . . . . A C . . . . . T T GGC T . . . . . C . . . . .                                                                   |       |       |       | AC C CT T C . . . . .   |       |       |
| Meme*21               | C T TT AG CC . . . . . A C . . . . . T T GGC T . . . . . C . . . . .                                                                  |       |       |       | AC C CT T C . . . . .   |       |       |
| Meme*PS05             | .....                                                                                                                                 | ..... | ..... | ..... | .....                   | C     | ..... |
| Meme*PS06             | CAT TT AG C . . . . . A C . . . . . T T GGC T . . . . . C . . . . .                                                                   |       |       |       | AC C CT T C . . . . .   |       |       |

Supplementary Figure S2
