# Supplementary material
Source: PubMed Central journal article supplement (PMC6327056)

b1

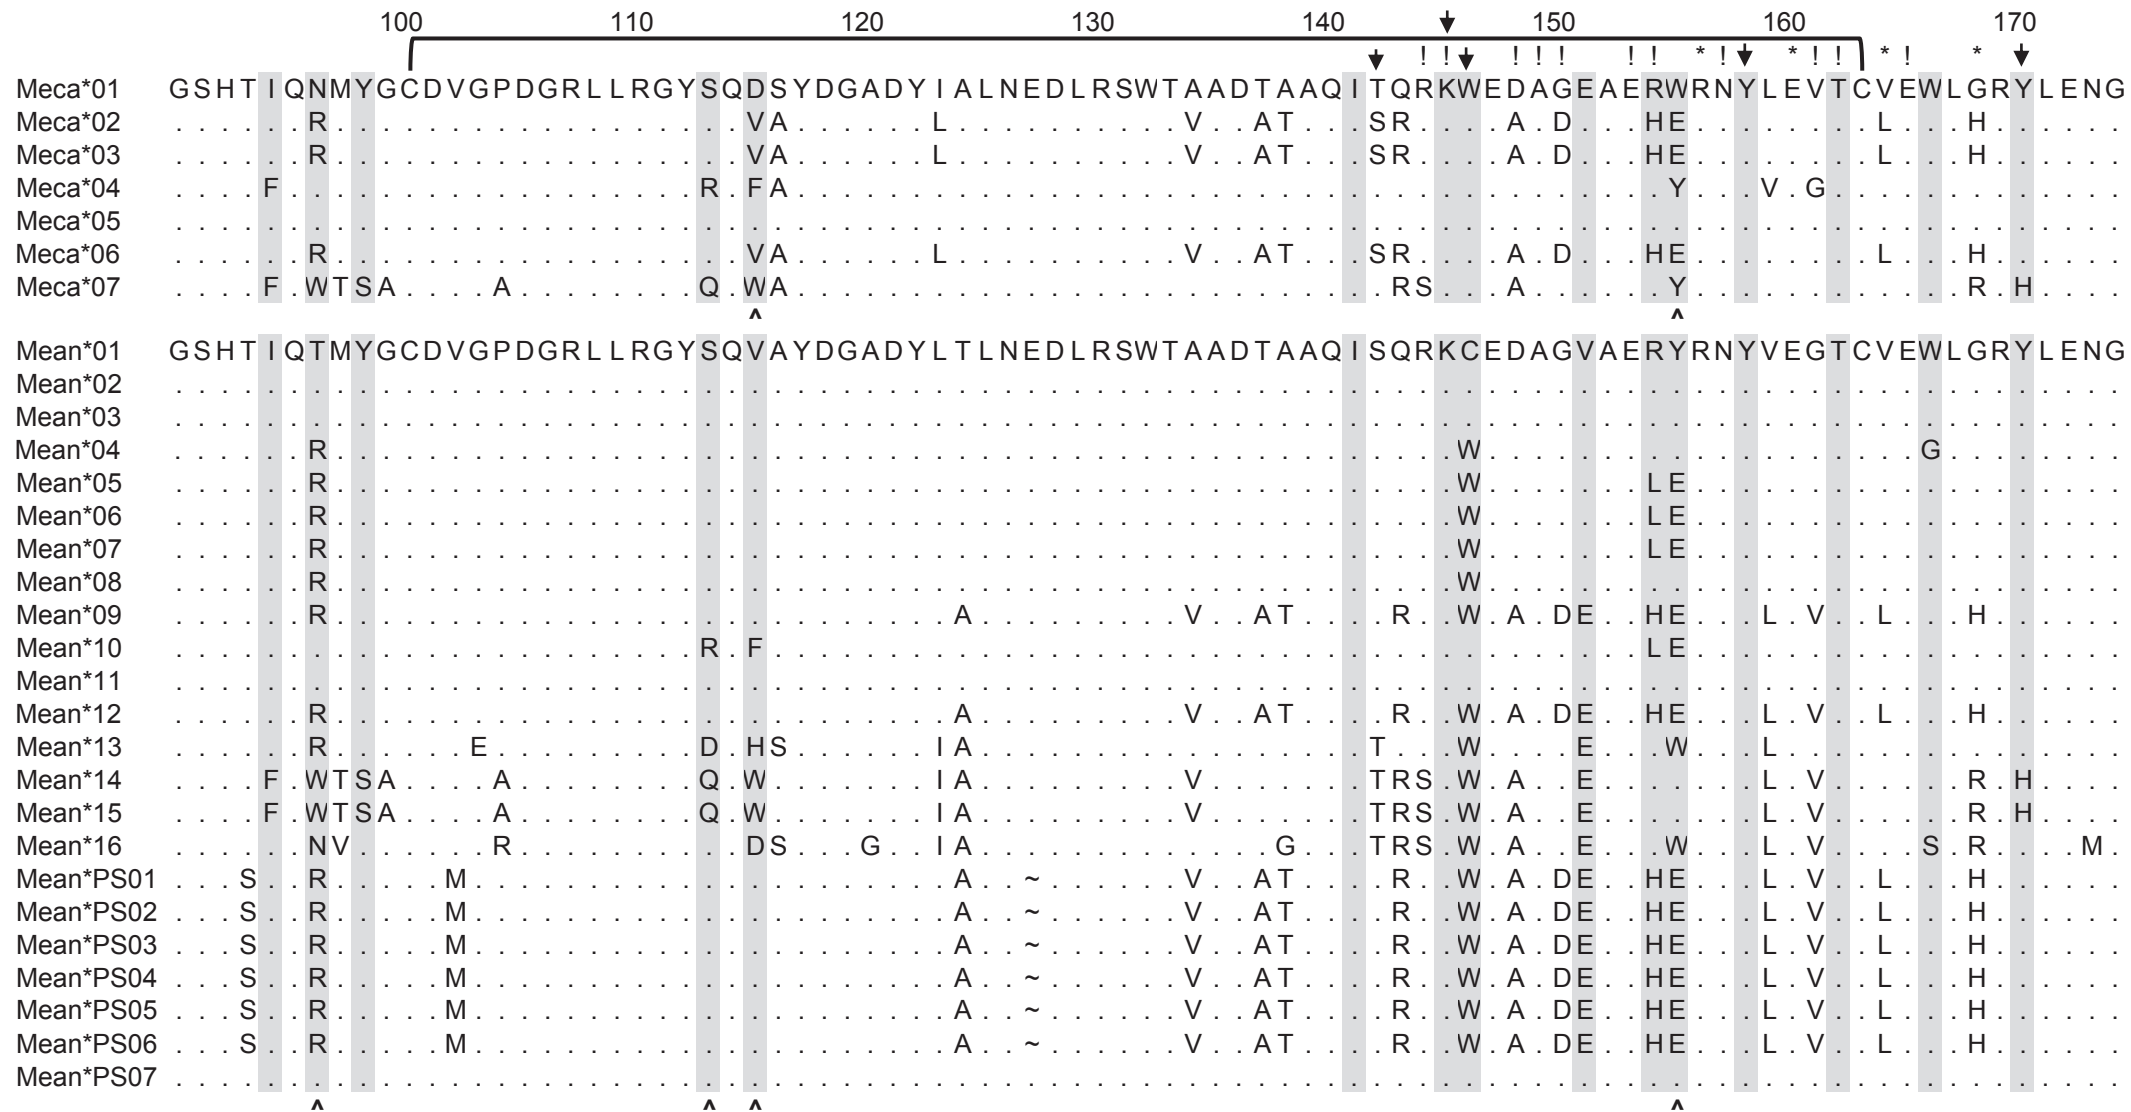

Supplementary Figure S1b1

Supplement: 41437_2018_100_MOESM3_ESM.pdf [file 41437_2018_100_MOESM3_ESM.pdf]

a

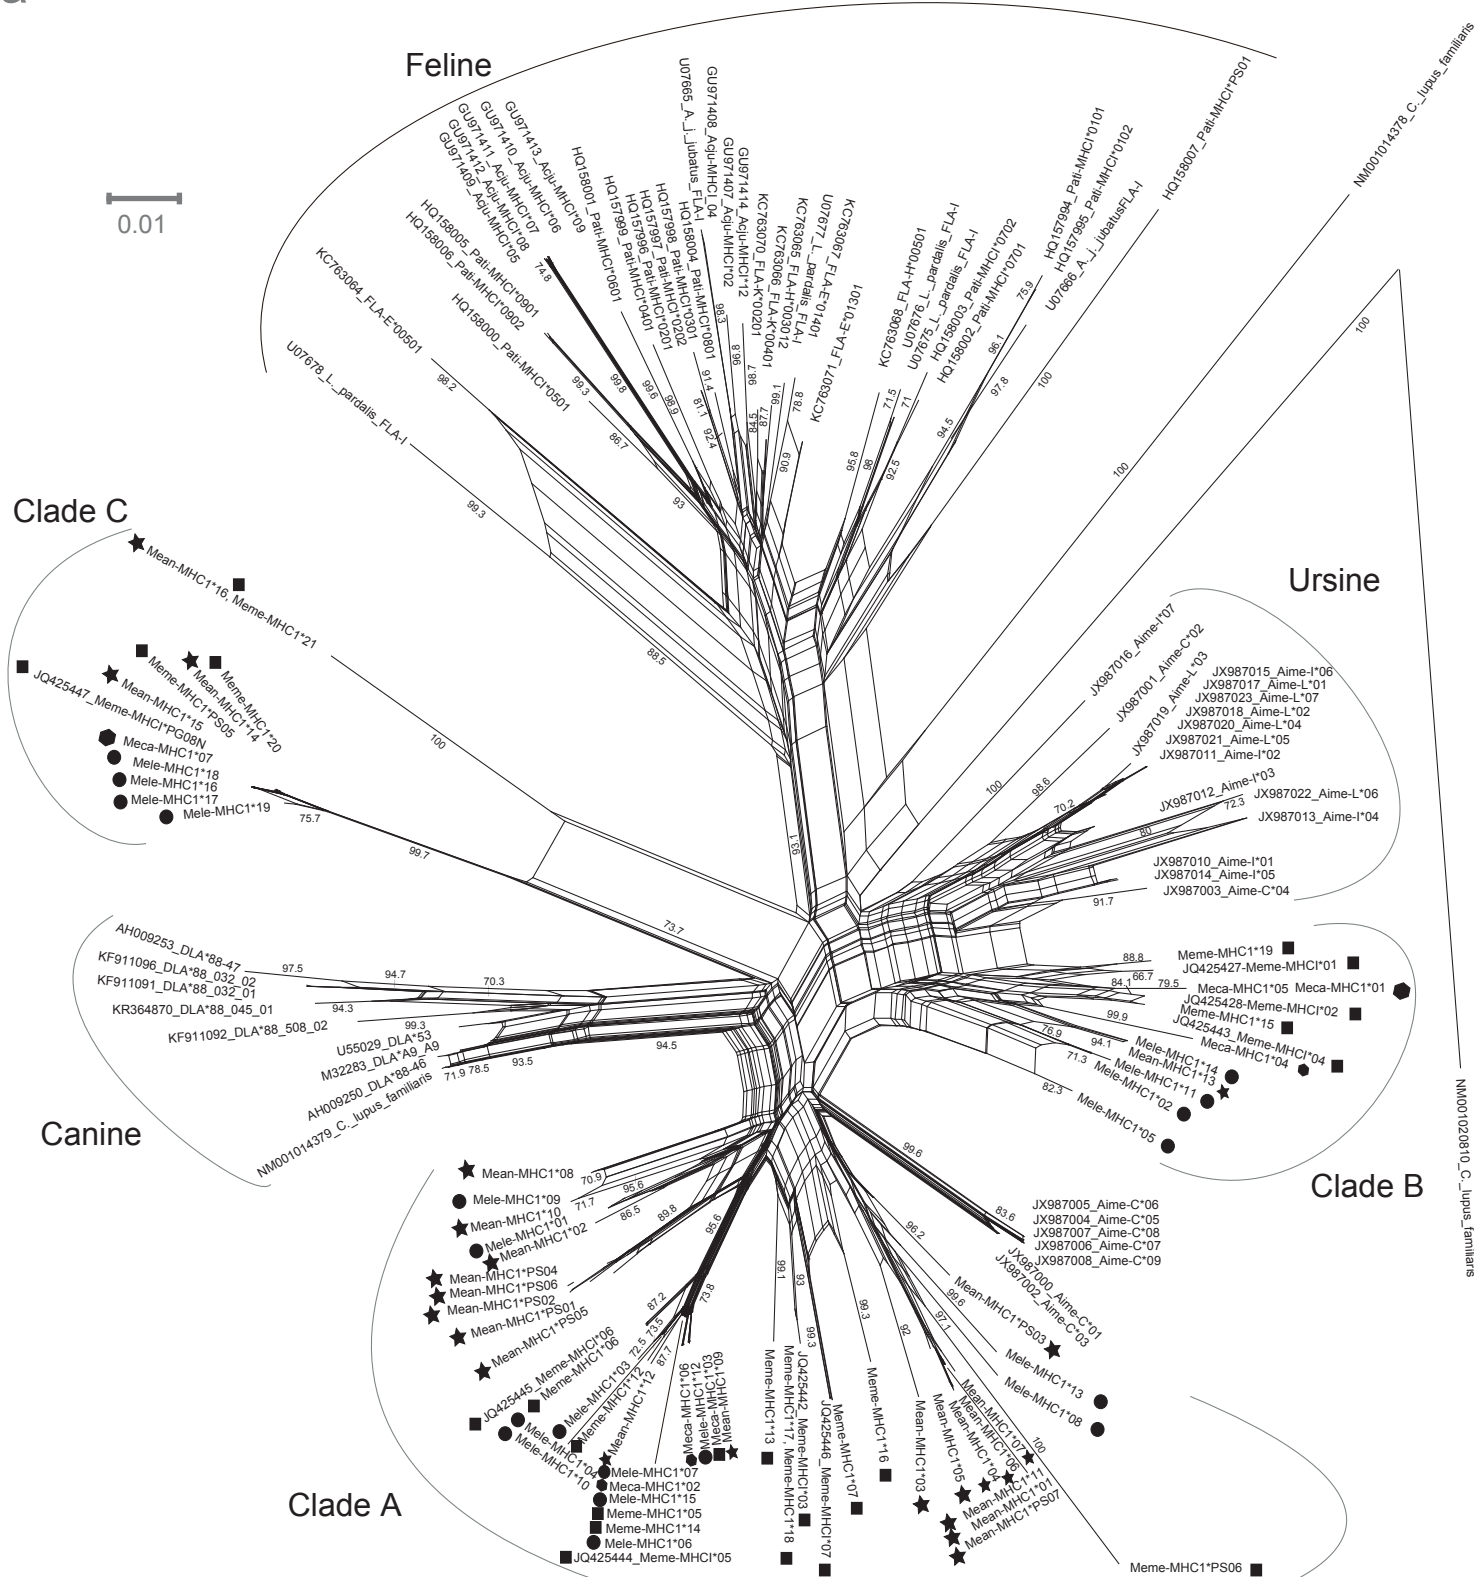

Supplementary Figure\_3a

Supplement: 41437_2018_100_MOESM6_ESM.pdf [file 41437_2018_100_MOESM6_ESM.pdf]

b

0.01

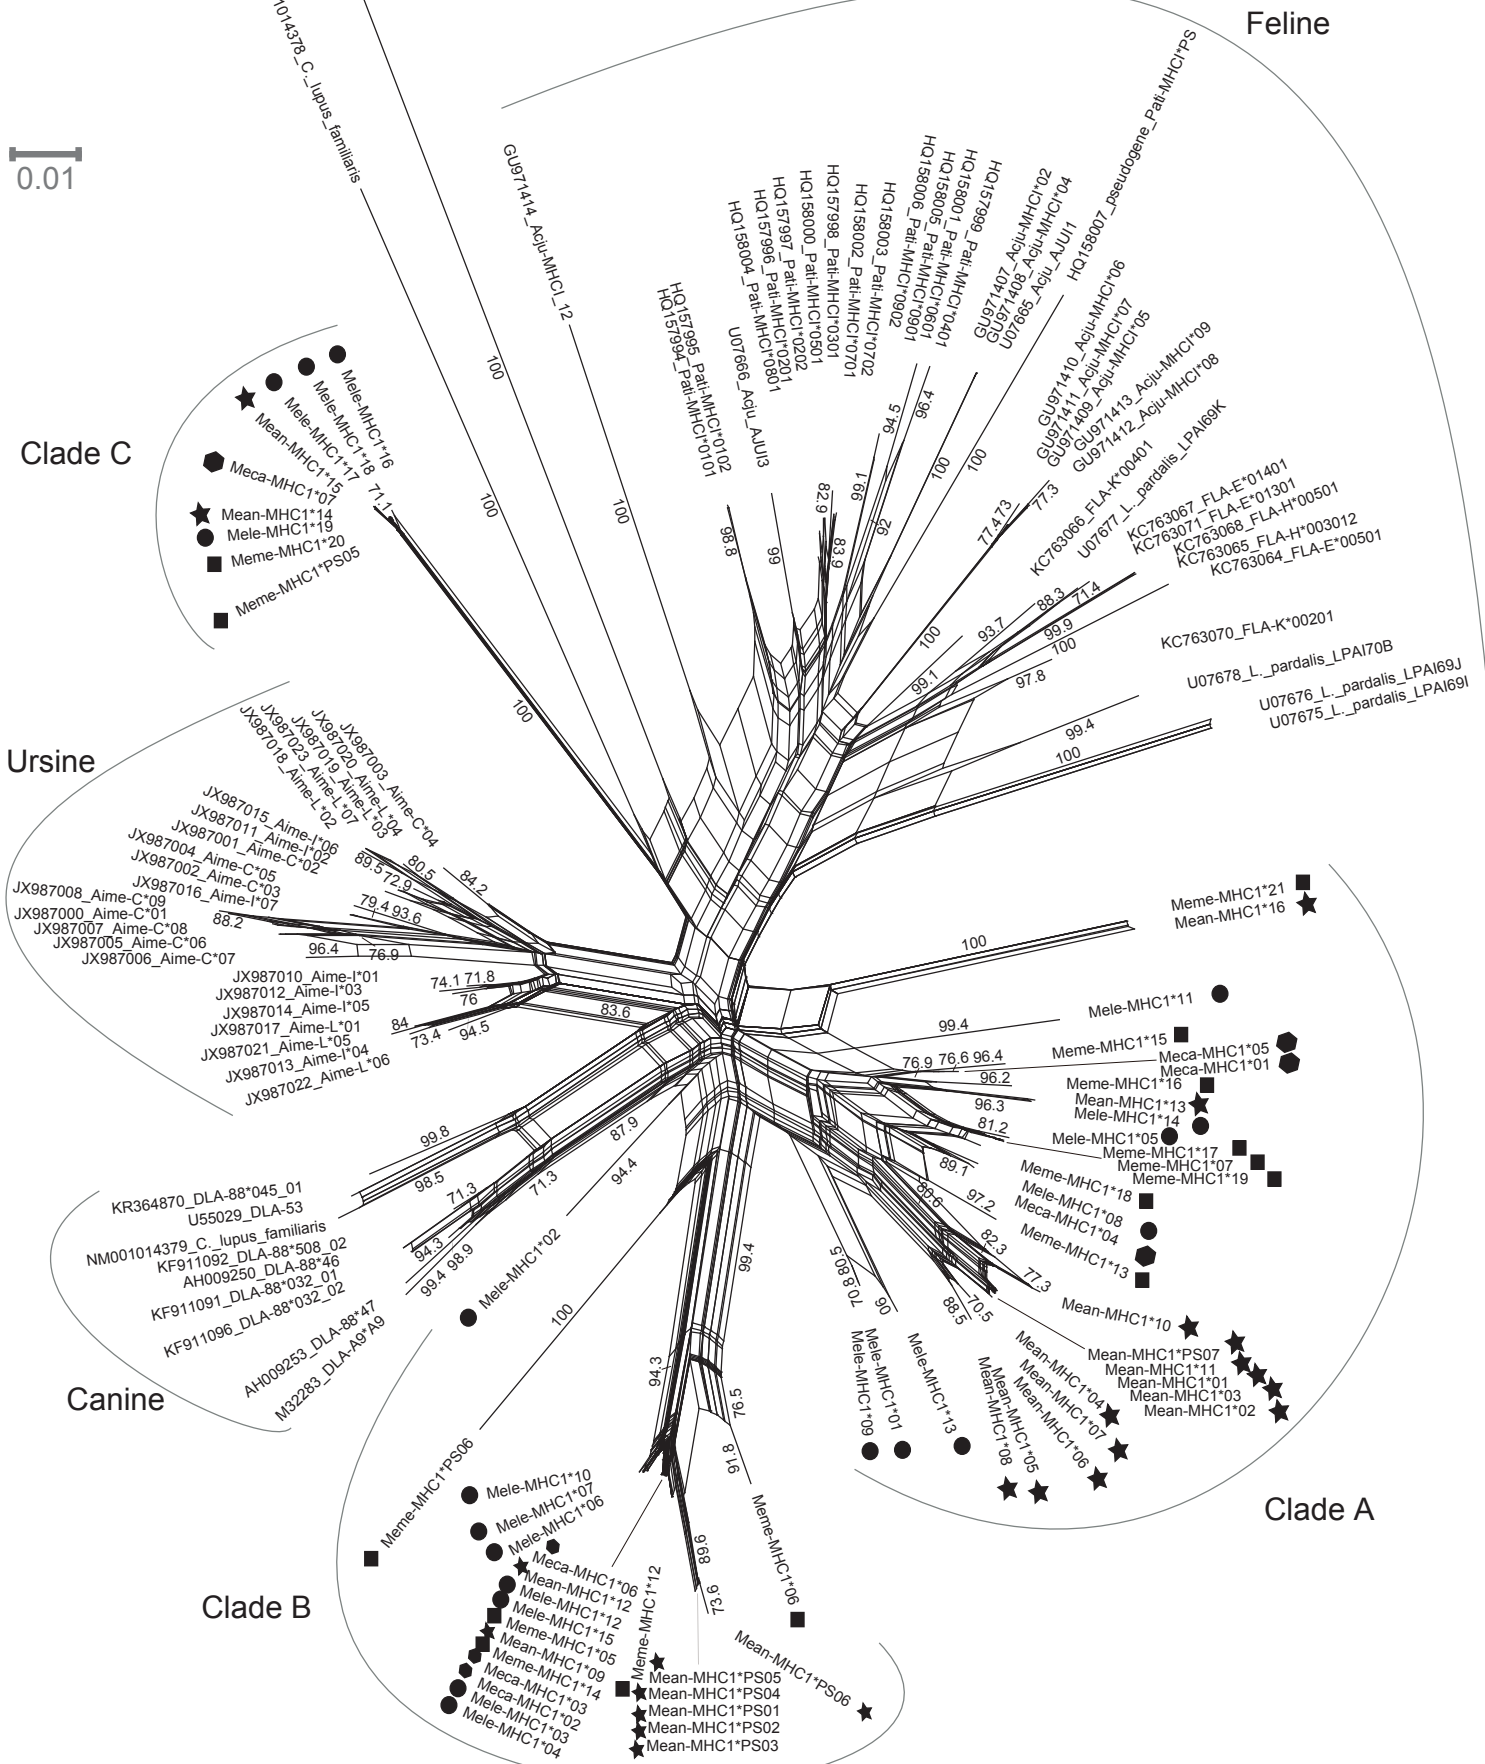

Supplementary Figure S3b

Supplement: 41437_2018_100_MOESM7_ESM.pdf [file 41437_2018_100_MOESM7_ESM.pdf]

C

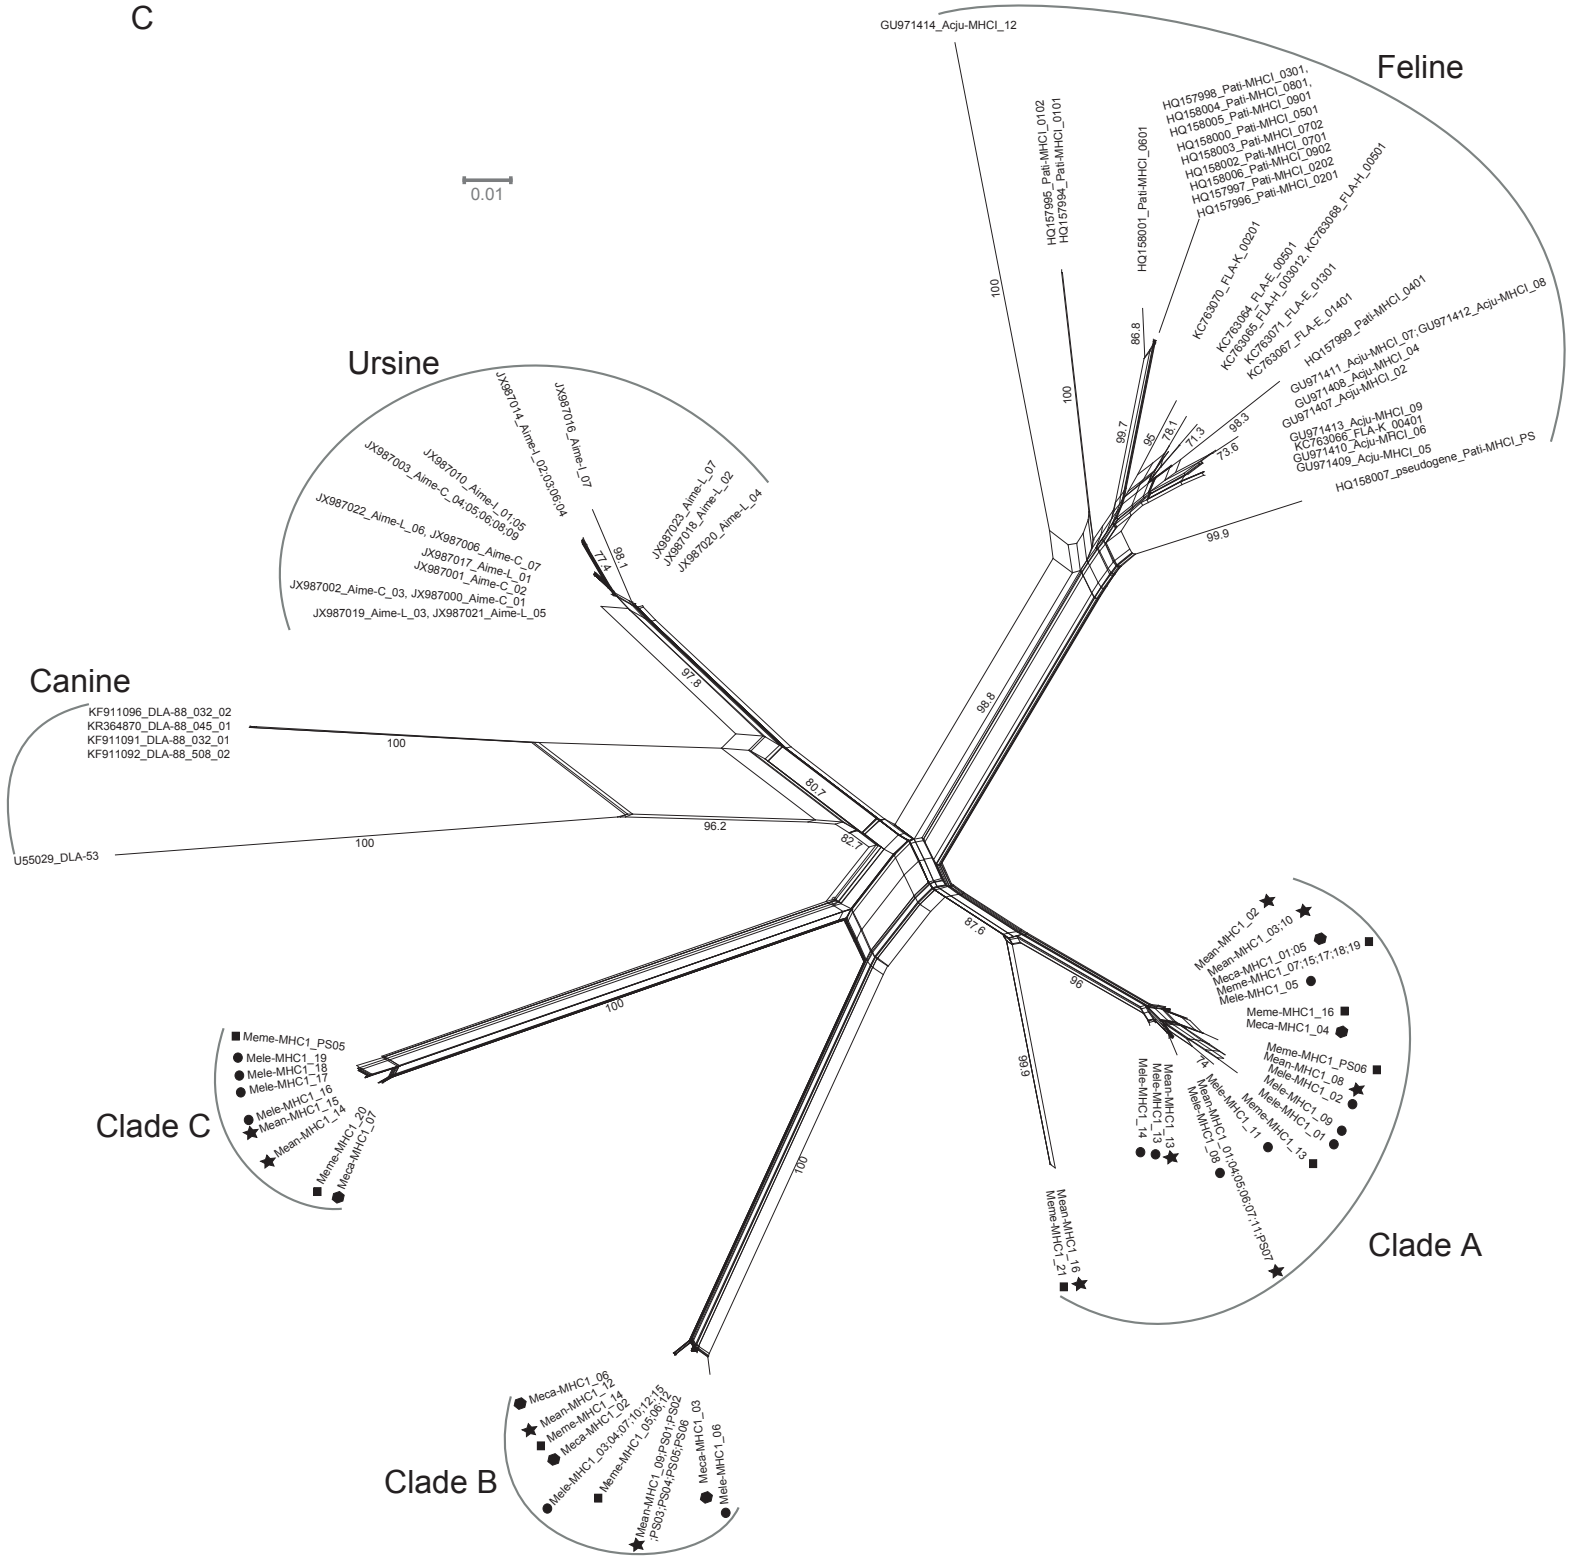

Supplementary Figure S3c

Supplement: 41437_2018_100_MOESM8_ESM.pdf [file 41437_2018_100_MOESM8_ESM.pdf]
